# Supplementary material for: Multi-criteria decision-making for flood risk management: a survey of the current state of the art
Source: Copernicus journal article supplement (doi:10.5194/nhess-16-1019-2016), 2016-04-26
Supplement: Supplementary file 1 [file nhess-16-1019-2016-supplement.pdf]

Supplement of Nat. Hazards Earth Syst. Sci., 16, 1019–1033, 2016  
<http://www.nat-hazards-earth-syst-sci.net/16/1019/2016/>  
doi:10.5194/nhess-16-1019-2016-supplement  
© Author(s) 2016. CC Attribution 3.0 License.

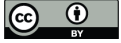

Natural Hazards  
and Earth System  
Sciences  Open Access

*Supplement of*

## **Multi-criteria decision-making for flood risk management: a survey of the current state of the art**

**M. de Brito and M. Evers**

*Correspondence to:* Mariana Madruga de Brito (mmdb@outlook.com)

The copyright of individual parts of the supplement might differ from the CC-BY 3.0 licence.

| Author(s)              | Year | Title of the publication                                                                                                     | Journal                                                       | Country(ies) of application | Area(s) of application                | MCDM method(s)                       | Involvement of multiple stakeholders | Participatory technique(s) applied*         | Sensitivity analysis | Sensitivity analysis method  | Uncertainty analysis | Uncertainty analysis method |
|------------------------|------|------------------------------------------------------------------------------------------------------------------------------|---------------------------------------------------------------|-----------------------------|---------------------------------------|--------------------------------------|--------------------------------------|---------------------------------------------|----------------------|------------------------------|----------------------|-----------------------------|
| Tkach and Somonovic    | 1997 | A new approach to multi-criteria decision making in water resources                                                          | Journal of Geographic Information and Decision Analysis       | Canada                      | alternative ranking                   | SCP, CP                              | No                                   |                                             | No                   |                              | No                   |                             |
| Buzolic et al.         | 2001 | Decision support system for disaster communications in Dalmatia                                                              | International Journal of Emergency Management                 | Croatia                     | emergency management                  | PROMETHEE                            | No                                   |                                             | No                   |                              | No                   |                             |
| Margeta and Knezic     | 2002 | Selection of the flood management solution of Karstic Field                                                                  | Water International                                           | Croatia                     | alternative ranking                   | AHP, PROMETHEE I, PROMETHEE II       | Yes                                  | does not mention                            | No                   |                              | No                   |                             |
| Azibi and Vanderpooten | 2003 | Aggregation of dispersed consequences for constructing criteria: the evaluation of flood risk reduction strategies           | European Journal of Operational Research                      | France                      | alternative ranking                   | WSM                                  | Yes                                  | group meeting                               | No                   |                              | No                   |                             |
| Bana e Costa et al.    | 2004 | Multicriteria evaluation of flood control measures: the case of Ribeira do Livramento                                        | Water Resources Management                                    | Portugal                    | alternative ranking                   | MACBETH                              | Yes                                  | interviews                                  | Yes                  | one-way sensitivity analysis | No                   |                             |
| Brouwer and van Ek     | 2004 | Integrated ecological, economic and social impact assessment of alternative flood control policies in the Netherlands        | Ecological Economics                                          | Netherlands                 | alternative ranking                   | WSM                                  | Yes                                  | stakeholder analysis                        | Yes                  | does not mention             | No                   |                             |
| Chen and Hou           | 2004 | Multicriterion decision making for flood control operations: theory and applications                                         | Journal of the American Water Resources Association           | China                       | reservoir flood control               | fuzzy recognition model              | No                                   |                                             | No                   |                              | No                   |                             |
| Levy                   | 2005 | Multiple criteria decision making and decision support systems for flood risk management                                     | Stochastic Environmental Research and Risk Assessment         | China                       | emergency management                  | ANP                                  | Yes                                  | workshops                                   | No                   |                              | No                   |                             |
| Simonovic and Niruoama | 2005 | A spatial multi-objective decision-making under uncertainty for water resources management                                   | Journal of Hydroinformatics                                   | Canada                      | alternative ranking                   | spatial fuzzy CP                     | No                                   |                                             | No                   |                              | No                   |                             |
| Al-Awadhi and Hersi    | 2006 | Surface runoff hazard map distribution in Kuwait                                                                             | Management of Environmental Quality: An International Journal | Kuwait                      | susceptibility                        | AHP                                  | Yes                                  | Delphi technique                            | No                   |                              | No                   |                             |
| Plattner et al.        | 2006 | Integrating public risk perception into formal natural hazard risk assessment                                                | Natural Hazards and Earth System Sciences                     | Germany                     | risk                                  | AHP                                  | Yes                                  | delphi technique, workshops, questionnaires | No                   |                              | No                   |                             |
| Simonovic and Akter    | 2006 | Participatory floodplain management in the Red River Basin, Canada                                                           | Annual Reviews in Control                                     | Canada                      | alternative ranking                   | fuzzy CP                             | Yes                                  | interviews, questionnaires, workshops       | No                   |                              | No                   |                             |
| Gao et al.             | 2007 | An assessment of flood hazard vulnerability in the Dongting Lake Region of China                                             | Lakes & Reservoirs: Research and Management                   | China                       | susceptibility, hazard, vulnerability | AHP                                  | Yes                                  | does not mention                            | No                   |                              | No                   |                             |
| Kenyon                 | 2007 | Evaluating flood risk management options in Scotland: a participant-led multi-criteria approach                              | Ecological Economics                                          | Scotland                    | alternative ranking                   | rank sum method, rank order centroid | Yes                                  | workshops                                   | No                   |                              | No                   |                             |
| Lee and Chung          | 2007 | Development of integrated watershed management schemes for an intensively urbanized region in Korea                          | Journal of Hydro-environment Research                         | South Korea                 | hazard, vulnerability, risk           | composite programming, AHP           | Yes                                  | does not mention                            | No                   |                              | No                   |                             |
| Levy et al.            | 2007 | Multi-criteria decision support systems for flood hazard mitigation and emergency response in urban watersheds               | Journal of the American Water Resources Association           | Japan                       | emergency management                  | ANP                                  | Yes                                  | interviews                                  | No                   |                              | No                   |                             |
| Martin et al.          | 2007 | Urban stormwater drainage management: the development of a multicriteria decision aid approach for best management practices | European Journal of Operational Research                      | France                      | alternative ranking                   | ELECTRE III                          | Yes                                  | questionnaires                              | Yes                  | one-way sensitivity analysis | No                   |                             |

|                         |      |                                                                                                                                                        |                                                                     |             |                                |                                                            |     |                                                |     |                                                           |     |                                          |
|-------------------------|------|--------------------------------------------------------------------------------------------------------------------------------------------------------|---------------------------------------------------------------------|-------------|--------------------------------|------------------------------------------------------------|-----|------------------------------------------------|-----|-----------------------------------------------------------|-----|------------------------------------------|
| Rahman and Saha         | 2007 | Flood hazard zonation - a GIS aided Multi Criteria Evaluation (MCE) approach with remotely sensed data                                                 | International Journal of Geoinformatics                             | Bangladesh  | hazard                         | AHP                                                        | Yes | focus group discussions                        | No  | No                                                        |     |                                          |
| Fu                      | 2008 | A fuzzy optimization method for multicriteria decision making: an application to reservoir flood control operation                                     | Expert Systems with Applications                                    | China       | reservoir flood control        | extended fuzzy TOPSIS                                      | No  |                                                | No  | No                                                        |     |                                          |
| Raaijmakers et al.      | 2008 | Flood risk perceptions and spatial multi-criteria analysis: an exploratory research for hazard mitigation                                              | Natural Hazards                                                     | Spain       | alternative ranking            | WSM                                                        | Yes | questionnaires, interviews                     | No  | No                                                        |     |                                          |
| Scolobig et al.         | 2008 | Integrating multiple perspectives in social multicriteria evaluation of flood-mitigation alternatives: the case of Malborghetto-Valbruna               | Environment and Planning C - Government and Policy                  | Italy       | alternative ranking            | NAIADE                                                     | Yes | interviews, questionnaires, narrative analysis | No  | No                                                        |     |                                          |
| Sinha et al.            | 2008 | Flood risk analysis in the Kosi river basin, north Bihar using multi-parametric approach of AHP                                                        | Journal of the Indian Society of Remote Sensing                     | India       | susceptibility                 | AHP                                                        | No  |                                                | No  | No                                                        |     |                                          |
| Yazdandoost and Bozorgy | 2008 | Flood risk management strategies using multi-criteria analysis                                                                                         | Proceedings of the Institution of Civil Engineers: Water Management | Germany     | alternative ranking            | WSM, evamix                                                | No  |                                                | Yes | probabilistic sensitivity analysis                        | No  |                                          |
| Chung and Lee           | 2009 | Identification of spatial ranking of hydrological vulnerability using multicriteria decision making techniques: Case study of Korea                    | Water Resources Management                                          | South Korea | hazard, vulnerability, risk    | AHP, Composite programming, CP, ELECTRE II, evamix, Regime | Yes | questionnaires                                 | No  | No                                                        |     |                                          |
| Jiang et al.            | 2009 | Risk assessment and validation of flood disaster based on fuzzy mathematics                                                                            | Progress in Natural Science                                         | Malaysia    | risk                           | AHP                                                        | No  |                                                | No  | No                                                        |     |                                          |
| Kienberger et al.       | 2009 | Spatial vulnerability units – expert-based spatial modelling of socio-economic vulnerability in the Salzach catchment, Austria                         | Natural Hazards and Earth System Sciences                           | Austria     | vulnerability, coping capacity | AHP                                                        | Yes | questionnaires                                 | No  | No                                                        |     |                                          |
| Kubal et al.            | 2009 | Integrated urban flood risk assessment – adapting a multicriteria approach to a city                                                                   | Natural Hazards and Earth System Sciences                           | Germany     | vulnerability, risk            | WSM                                                        | No  |                                                | No  | No                                                        |     |                                          |
| Lim and Lee             | 2009 | The spatial MCDA approach for evaluating flood damage reduction alternatives                                                                           | KSCE Journal of Civil Engineering                                   | South Korea | alternative ranking            | CP, SPC                                                    | No  |                                                | No  | No                                                        |     |                                          |
| Meyer et al.            | 2009 | Flood risk assessment in European river basins - concept, methods, and challenges exemplified at the Mulde River                                       | Integrated Environmental Assessment and Management                  | Germany     | risk                           | WSM                                                        | No  |                                                | Yes | one-way sensitivity analysis                              | No  |                                          |
| Meyer et al.            | 2009 | A multicriteria approach for flood risk mapping exemplified at the Mulde river, Germany                                                                | Natural Hazards                                                     | Germany     | risk                           | MAUT, Disjunctive approach                                 | No  |                                                | Yes | one-way sensitivity analysis                              | No  |                                          |
| Nijssen et al.          | 2009 | Planning of technical flood retention measures in large river basins under consideration of imprecise probabilities of multivariate hydrological loads | Natural Hazards and Earth System Sciences                           | Germany     | alternative ranking            | fuzzy AHP                                                  | No  |                                                | No  | No                                                        |     |                                          |
| Choudhury               | 2010 | Reservoir flood control operation model incorporating multiple uncontrolled water flows                                                                | Lakes & Reservoirs: Research and Management                         | India       | reservoir flood control        | goal programming                                           | No  |                                                | No  | No                                                        |     |                                          |
| Fernández and Lutz      | 2010 | Urban flood hazard zoning in Tucumán Province, Argentina, using GIS and multicriteria decision analysis                                                | Engineering Geology                                                 | Argentina   | susceptibility                 | AHP                                                        | No  |                                                | Yes | global sensitivity analysis (FAST method) and Monte Carlo | Yes | Taylor's series error propagation method |
| Schumann                | 2010 | Handling uncertainties of hydrological loads in flood retention planning                                                                               | International Journal of River Basin Management                     | Germany     | alternative ranking            | TOPSIS, fuzzy AHP                                          | No  |                                                | No  | No                                                        |     |                                          |

|                         |      |                                                                                                                                                                                                                 |                                                                      |                                        |                                       |                     |     |                                  |                              |                              |     |                                  |
|-------------------------|------|-----------------------------------------------------------------------------------------------------------------------------------------------------------------------------------------------------------------|----------------------------------------------------------------------|----------------------------------------|---------------------------------------|---------------------|-----|----------------------------------|------------------------------|------------------------------|-----|----------------------------------|
| Vafaei and Harati       | 2010 | Strategic management in decision support system for coastal flood management                                                                                                                                    | International Journal of Environmental Research                      | Iran                                   | alternative ranking                   | AHP                 | No  | No                               | No                           |                              |     |                                  |
| Yahaya et al.           | 2010 | Multicriteria analysis for flood vulnerable areas in Hadejia-Jama'are River Basin, Nigeria                                                                                                                      | European Journal of Scientific Research                              | Nigeria                                | hazard                                | AHP                 | No  | Yes                              | one-way sensitivity analysis | No                           |     |                                  |
| Ceccato et al.          | 2011 | Participatory assessment of adaptation strategies to flood risk in the Upper Brahmaputra and Danube river basins                                                                                                | Environmental Science & Policy                                       | Germany, Austria, India, Bhutan, China | alternative ranking                   | ELECTRE III         | Yes | Delphi technique, workshops      | Yes                          | one-way sensitivity analysis | Yes | qualitative uncertainty analysis |
| Chen et al.             | 2011 | Integrated application of the analytic hierarchy process and the geographic information system for flood risk assessment and flood plain management in Taiwan                                                   | Natural Hazards                                                      | Taiwan                                 | risk                                  | AHP                 | Yes | questionnaires                   | No                           | No                           |     |                                  |
| Dang et al.             | 2011 | Evaluation of flood risk parameters in the Day River flood diversion area, Red River Delta, Vietnam                                                                                                             | Natural Hazards                                                      | Vietnam                                | hazard, vulnerability, risk           | AHP                 | Yes | workshops, interviews            | No                           | No                           |     |                                  |
| Das et al.              | 2011 | An aggregative fuzzy risk analysis for flood incident management                                                                                                                                                | International Journal of System Assurance Engineering and Management | Canada                                 | emergency management                  | fuzzy AHP           | No  | No                               | No                           |                              |     |                                  |
| Deshmukh et al.         | 2011 | Impact of flood damaged critical infrastructure on communities and industries                                                                                                                                   | Built Environment Project and Asset Management                       | USA                                    | emergency management                  | AHP                 | Yes | questionnaires, interviews       | No                           | No                           |     |                                  |
| Jun et al.              | 2011 | Development of spatial water resources vulnerability index considering climate change impacts                                                                                                                   | Science of The Total Environment                                     | China                                  | risk                                  | TOPSIS              | Yes | questionnaires, interviews       | Yes                          | one-way sensitivity analysis | No  |                                  |
| Kourgialas and Karatzas | 2011 | Flood management and a GIS modelling method to assess flood-hazard areas—a case study                                                                                                                           | Hydrological Sciences Journal                                        | Greece                                 | hazard                                | WSM                 | No  | No                               | No                           |                              |     |                                  |
| Liu et al.              | 2011 | Assessment of capacity of flood disaster prevention and reduction with 2-tuple linguistic information                                                                                                           | Journal of Convergence Information Technology                        | China                                  | coping capacity                       | TOPSIS              | No  | No                               | No                           |                              |     |                                  |
| Malekmohammadi et al.   | 2011 | Ranking solutions of multi-objective reservoir operation optimization models using multi-criteria decision analysis                                                                                             | Expert Systems with Applications                                     | Iran                                   | reservoir flood control               | ELECTRE-TRI         | No  | Yes                              | does not mention             | No                           |     |                                  |
| Ozturk and Batuk        | 2011 | Implementation of GIS-based multicriteria decision analysis with VB in ArcGIS                                                                                                                                   | International Journal of Information Technology & Decision Making    | Turkey                                 | susceptibility                        | AHP                 | No  | Yes                              | one-way sensitivity analysis | No                           |     |                                  |
| Sarker et al.           | 2011 | GIS and RS combined analysis for flood prediction mapping - a case study of Dhaka City corporation, Bangladesh                                                                                                  | International Journal of Environmental Protection                    | Bangladesh                             | susceptibility                        | AHP                 | No  | No                               | No                           |                              |     |                                  |
| Scheuer et al.          | 2011 | Exploring multicriteria flood vulnerability by integrating economic, social and ecological dimensions of flood risk and coping capacity - from a starting point view towards an end point view of vulnerability | Natural Hazards                                                      | Germany                                | vulnerability , coping capacity, risk | WSM                 | No  | No                               | No                           |                              |     |                                  |
| Wang et al.             | 2011 | Flood control operations based on the theory of variable fuzzy sets                                                                                                                                             | Water Resources Management                                           | China                                  | reservoir flood control               | variable fuzzy sets | No  | No                               | No                           |                              |     |                                  |
| Wang et al.             | 2011 | A GIS-based spatial multi-criteria approach for flood risk assessment in the Dongting Lake Region, Hunan, Central China                                                                                         | Water Resources Management                                           | China                                  | hazard, vulnerability, risk           | fuzzy AHP           | Yes | Delphi technique, questionnaires | No                           | No                           |     |                                  |
| Adiat et al.            | 2012 | Integration of geographic information system and 2D imaging to investigate the effects of subsurface conditions on flood occurrence                                                                             | Modern Applied Science                                               | Malaysia                               | hazard                                | AHP                 | No  | No                               | No                           |                              |     |                                  |

|                            |      |                                                                                                                                          |                                                                        |                |                                                                                   |                           |     |                                                                                 |     |                               |     |                  |
|----------------------------|------|------------------------------------------------------------------------------------------------------------------------------------------|------------------------------------------------------------------------|----------------|-----------------------------------------------------------------------------------|---------------------------|-----|---------------------------------------------------------------------------------|-----|-------------------------------|-----|------------------|
| Ball et al.                | 2012 | A new methodology to assess the benefits of flood warning                                                                                | Journal of Flood Risk Management                                       | UK             | emergency management, alternative ranking                                         | WSM                       | Yes | workshops, interviews, questionnaires                                           | Yes | one-way sensitivity analysis  | No  |                  |
| Chen and Chen              | 2012 | Spatio-temporal variation of flood vulnerability at the Poyang Lake Ecological Economic Zone, Jiangxi Province, China                    | Water Science & Technology                                             | China          | hazard, coping capacity, vulnerability, risk                                      | AHP                       | No  |                                                                                 | No  |                               | No  |                  |
| Chen et al.                | 2012 | Losses assessment for region flood disasters based on entropy weight TOPSIS model                                                        | Advances in Information Sciences and Service Sciences                  | China          | risk                                                                              | TOPSIS                    | No  |                                                                                 | No  |                               | No  |                  |
| Elmoustafa                 | 2012 | Weighted normalized risk factor for floods risk assessment                                                                               | Ain Shams Engineering Journal                                          | Egypt          | susceptibility                                                                    | WSM                       | No  |                                                                                 | No  |                               | No  |                  |
| Evers et al.               | 2012 | Collaborative modelling for active involvement of stakeholders in urban flood risk management                                            | Natural Hazards and Earth System Sciences                              | Germany and UK | alternative ranking                                                               | fuzzy TOPSIS              | Yes | stakeholder analysis, interviews, group meetings, workshops, web-based platform | No  |                               | No  |                  |
| Haque et al.               | 2012 | Participatory integrated assessment of flood protection measures for climate adaptation in Dhaka                                         | Environment and Urbanization                                           | Bangladesh     | alternative ranking                                                               | WSM                       | Yes | focus group discussions                                                         | Yes | one-way sensitivity analysis  | No  |                  |
| Irvem et al.               | 2012 | Identification of flood risk area in the Orontes river basin, Turkey, using multi-criteria decision analyses                             | Journal of Food, Agriculture & Environment                             | Turkey         | hazard                                                                            | AHP                       | No  |                                                                                 | No  |                               | No  |                  |
| Kandilioti and Makropoulos | 2012 | Preliminary flood risk assessment: the case of Athens                                                                                    | Natural Hazards                                                        | Greece         | susceptibility, vulnerability, risk                                               | AHP                       | Yes | questionnaires                                                                  | Yes | best and worst case scenarios | No  |                  |
| Li et al.                  | 2012 | Research on flood risk analysis and evaluation method based on variable fuzzy sets and information diffusion                             | Safety Science                                                         | China          | risk                                                                              | AHP                       | No  |                                                                                 | No  |                               | No  |                  |
| Majlingová et al.          | 2012 | An assessment of hucava mountain stream catchment susceptibility to flooding                                                             | Journal of Forest Science                                              | Slovakia       | susceptibility                                                                    | WSM                       | No  |                                                                                 | No  |                               | No  |                  |
| Markovic                   | 2012 | Multi criteria analysis of hydraulic structures for river training works                                                                 | Water Resources Management                                             | Serbia         | alternative ranking                                                               | ELECTRE                   | No  |                                                                                 | No  |                               | No  |                  |
| Musungu et al.             | 2012 | Using multi-criteria evaluation and GIS for flood risk analysis in informal settlements of Cape Town: the case of Graveyard Pond         | South African Journal of Geomatics                                     | South Africa   | vulnerability                                                                     | AHP                       | Yes | questionnaires                                                                  | No  |                               | No  |                  |
| Yang et al.                | 2012 | A fuzzy AHP-TFN based evaluation model of flood risk analysis                                                                            | Journal of Computational Information Systems                           | China          | susceptibility, hazard, risk, vulnerability, coping capacity, alternative ranking | fuzzy AHP-TFN             | No  |                                                                                 | No  |                               | No  |                  |
| Elmoustafa et al.          | 2013 | Flash flood risk assessment using morphological parameters in Sinai peninsula                                                            | Open Journal of Modern Hydrology                                       | Egypt          | susceptibility                                                                    | WSM                       | No  |                                                                                 | Yes | does not mention              | No  |                  |
| Gaňová et al.              | 2013 | A rainfall distribution and their influence on flood generation in the eastern Slovakia                                                  | Acta Universitatis Agriculturae et Silviculturae Mendelianae Brunensis | Slovakia       | hazard                                                                            | rank sum method           | No  |                                                                                 | No  |                               | No  |                  |
| Ghanbarpour et al.         | 2013 | A comparative evaluation of flood mitigation alternatives using GIS-based river hydraulics modelling and multicriteria decision analysis | Journal of Flood Risk Management                                       | Iran           | alternative ranking                                                               | TOPSIS                    | No  |                                                                                 | Yes | best and worst case scenarios | No  |                  |
| Giupponi et al.            | 2013 | A dynamic assessment tool for exploring and communicating vulnerability to floods and climate change                                     | Environmental Modelling & Software                                     | India          | vulnerability, coping capacity                                                    | MAVT                      | Yes | workshops, questionnaires                                                       | Yes | one-way sensitivity analysis  | Yes | does not mention |
| Jun et al.                 | 2013 | A fuzzy multi-criteria approach to flood risk vulnerability in South Korea by considering climate change impacts                         | Expert Systems with Applications                                       | South Korea    | hazard, coping capacity, vulnerability, risk                                      | WSM, TOPSIS, fuzzy TOPSIS | Yes | Delphi technique                                                                | No  |                               | No  |                  |

|                        |      |                                                                                                                                       |                                                       |             |                                                                   |                                                        |     |                                            |                              |                                                                 |     |                                  |
|------------------------|------|---------------------------------------------------------------------------------------------------------------------------------------|-------------------------------------------------------|-------------|-------------------------------------------------------------------|--------------------------------------------------------|-----|--------------------------------------------|------------------------------|-----------------------------------------------------------------|-----|----------------------------------|
| Kang et al.            | 2013 | A sensitivity analysis approach of multi-attribute decision making technique to rank flood mitigation projects                        | KSCE Journal of Civil Engineering                     | South Korea | alternative ranking                                               | WSM                                                    | No  | Yes                                        | one-way sensitivity analysis | No                                                              |     |                                  |
| Le Cozannet et al.     | 2013 | An AHP-derived method for mapping the physical vulnerability of coastal areas at regional scales                                      | Natural Hazards and Earth System Sciences             | France      | susceptibility                                                    | AHP                                                    | Yes | does not mention                           | Yes                          | one-way sensitivity analysis                                    | Yes | qualitative uncertainty analysis |
| Lee et al.             | 2013 | Integrated multi-criteria flood vulnerability approach using fuzzy TOPSIS and Delphi technique                                        | Natural Hazards and Earth System Sciences             | South Korea | risk                                                              | fuzzy TOPSIS                                           | Yes | Delphi technique                           | No                           |                                                                 | No  |                                  |
| Li                     | 2013 | Fuzzy approach to analysis of flood risk based on variable fuzzy sets and improved information diffusion methods                      | Natural Hazards and Earth System Sciences             | China       | risk                                                              | AHP                                                    | No  |                                            | No                           |                                                                 | Yes | Monte Carlo                      |
| Li et al.              | 2013 | Impact assessment of urbanization on flood risk in the Yangtze River Delta                                                            | Stochastic Environmental Research and Risk Assessment | China       | hazard, vulnerability, risk                                       | AHP                                                    | No  |                                            | No                           |                                                                 | No  |                                  |
| Marttunen et al.       | 2013 | How to design and realize participation of stakeholders in MCDA processes? A framework for selecting an appropriate approach          | EURO Journal on Decision Processes                    | Finland     | alternative ranking                                               | MAVT                                                   | Yes | interviews, group meetings, questionnaires | No                           |                                                                 | No  |                                  |
| Penning-Rowell et al.  | 2013 | A threatened world city: the benefits of protecting London from the sea                                                               | Natural Hazards                                       | UK          | alternative ranking                                               | weighted average                                       | Yes | does not mention                           | Yes                          | one-way sensitivity analysis ,and best and worst case scenarios | Yes | qualitative uncertainty analysis |
| Porthin et al.         | 2013 | Multi-criteria decision analysis in adaptation decision-making: a flood case study in Finland                                         | Regional Environmental Change                         | Finland     | alternative ranking                                               | MAVT                                                   | Yes | workshops                                  | Yes                          | one-way sensitivity analysis                                    | No  |                                  |
| Qi et al.              | 2013 | GIS-based spatial Monte Carlo analysis for integrated flood management with two dimensional flood simulation                          | Water Resources Management                            | USA         | alternative ranking                                               | SCP                                                    | Yes | questionnaires                             | Yes                          | does not mention                                                | Yes | Monte Carlo                      |
| Sahin et al.           | 2013 | Assessment of sea-level rise adaptation options: multiple-criteria decision-making approach involving stakeholders                    | Structural Survey                                     | Australia   | alternative ranking                                               | AHP                                                    | Yes | questionnaires                             | Yes                          | one-way sensitivity analysis                                    | No  |                                  |
| Salehi et al.          | 2013 | Urban flood hazard zonation using GIS and fuzzy-AHP analysis (Case study: Tehran city)                                                | Journal of Environmental Studies                      | Iran        | susceptibility                                                    | fuzzy AHP                                              | No  |                                            | No                           |                                                                 | No  |                                  |
| Saxena et al.          | 2013 | Development of habitation vulnerability assessment framework for coastal hazards: Cuddalore coast in Tamil Nadu, India—A case study   | Weather and Climate Extremes                          | India       | risk                                                              | AHP                                                    | Yes | interviews, questionnaires                 | No                           |                                                                 | No  |                                  |
| Solín                  | 2013 | Spatial variability in the flood vulnerability of urban areas in the headwater basins of Slovakia                                     | Journal of Flood Risk Management                      | Slovakia    | vulnerability                                                     | MAUT                                                   | No  |                                            | No                           |                                                                 | No  |                                  |
| Stefanidis and Stathis | 2013 | Assessment of flood hazard based on natural and anthropogenic factors using analytic hierarchy process (AHP)                          | Natural Hazards                                       | Greece      | susceptibility                                                    | AHP                                                    | No  |                                            | No                           |                                                                 | No  |                                  |
| Yang et al.            | 2013 | Application of a triangular fuzzy AHP approach for flood risk evaluation and response measures analysis                               | Natural Hazards                                       | China       | hazard, vulnerability, coping capacity, risk, alternative ranking | fuzzy AHP, trapezoidal fuzzy AHP, hybrid fuzzy AHP-TFN | No  |                                            | No                           |                                                                 | No  |                                  |
| Zagonari and Rossi     | 2013 | A heterogeneous multi-criteria multi-expert decision-support system for scoring combinations of flood mitigation and recovery options | Environmental Modelling & Software                    | Italy       | alternative ranking                                               | fuzzy TOPSIS                                           | Yes | does not mention                           | Yes                          | does not mention                                                | No  |                                  |
| Zou et al.             | 2013 | Comprehensive flood risk assessment based on set pair analysis-variable fuzzy sets model and fuzzy AHP                                | Stochastic Environmental Research and Risk Assessment | China       | hazard, vulnerability, risk                                       | trapezoidal fuzzy AHP                                  | Yes | does not mention                           | No                           |                                                                 | No  |                                  |

|                          |      |                                                                                                                                                        |                                                                  |             |                                              |                                                  |     |                            |     |                              |     |               |
|--------------------------|------|--------------------------------------------------------------------------------------------------------------------------------------------------------|------------------------------------------------------------------|-------------|----------------------------------------------|--------------------------------------------------|-----|----------------------------|-----|------------------------------|-----|---------------|
| Anaconda et al.          | 2014 | Moraine-dammed lake failures in Patagonia and assessment of outburst susceptibility in the Baker Basin                                                 | Natural Hazards and Earth System Sciences                        | Chile       | susceptibility                               | AHP                                              | No  |                            | No  | No                           |     |               |
| Chung et al.             | 2014 | Water resource vulnerability characteristics by district's population size in a changing climate using subjective and objective weights                | Sustainability                                                   | South Korea | hazard, coping capacity, vulnerability, risk | TOPSIS                                           | Yes | Delphi technique           | No  |                              | No  |               |
| Edjossan-Sossou et al.   | 2014 | A decision-support methodology for assessing the sustainability of natural risk management strategies in urban areas                                   | Natural Hazards and Earth System Sciences                        | France      | alternative ranking                          | weighted arithmetic mean                         | No  |                            | Yes | one-way sensitivity analysis | No  |               |
| Ghasemi et al.           | 2014 | Investigation of flooding and causative factors in Balegli Chay Watershed by GIS, RS, and AHP techniques                                               | Journal of Environmental Studies                                 | Iran        | hazard                                       | AHP                                              | No  |                            | No  |                              | No  |               |
| Guo et al.               | 2014 | Integrated risk assessment of flood disaster based on improved set pair analysis and the variable fuzzy set theory in central Liaoning Province, China | Natural Hazards                                                  | China       | hazard, coping capacity, vulnerability, risk | hybrid AHP entropy weight                        | No  |                            | No  |                              | No  |               |
| Hashemi et al.           | 2014 | An extended compromise ratio model with an application to reservoir flood control operation under an interval-valued intuitionistic fuzzy environment  | Applied Mathematical Modelling                                   | China       | reservoir flood control                      | fuzzy compromise ratio method                    | Yes | does not mention           | Yes | one-way sensitivity analysis | No  |               |
| Johnston et al.          | 2014 | Assessing the vulnerability of coastal infrastructure to sea level rise using multi-criteria analysis in Scarborough, Maine (USA)                      | Ocean & Coastal Management                                       | USA         | vulnerability                                | WSM                                              | No  |                            | No  |                              | No  |               |
| Lawal et al.             | 2014 | Group-based decision support for flood hazard forecasting: a geospatial technology-based group analytic hierarchy process approach                     | Research Journal of Applied Sciences, Engineering and Technology | Malaysia    | hazard                                       | AHP                                              | Yes | does not mention           | No  |                              | No  |               |
| Lee et al.               | 2014 | Robust spatial flood vulnerability assessment for Han River using fuzzy TOPSIS with $\alpha$ -cut level set                                            | Expert Systems with Applications                                 | South Korea | risk                                         | fuzzy TOPSIS, $\alpha$ -level based fuzzy TOPSIS | Yes | Delphi technique           | No  |                              | No  |               |
| Liu et al.               | 2014 | Rapid assessment of flood loss based on neural network ensemble                                                                                        | Transactions of Nonferrous Metals Society of China               | China       | risk                                         | AHP                                              | No  |                            | No  |                              | No  |               |
| Miyamoto et al.          | 2014 | Development of an integrated decision-making method for effective flood early warning system                                                           | Journal of Disaster Research                                     | Bangladesh  | alternative ranking                          | AHP-SWOT, fuzzy AHP                              | Yes | questionnaires, workshops  | No  |                              | No  |               |
| Ouma and Tateishi        | 2014 | Urban flood vulnerability and risk mapping using integrated multi-parametric AHP and GIS: methodological overview and case study assessment            | Water                                                            | Kenya       | hazard                                       | AHP                                              | Yes | does not mention           | No  |                              | No  |               |
| Radmehr and Araghinejad  | 2014 | Developing strategies for urban flood management of Tehran City using SMCDM and ANN                                                                    | Journal of Computing in Civil Engineering                        | Iran        | susceptibility                               | AHP                                              | No  |                            | No  |                              | No  |               |
| Shams et al.             | 2014 | Improving consistency evaluation in fuzzy multi-attribute pairwise comparison-based decision-making methods                                            | Asia-Pacific Journal of Operational Research                     | Australia   | alternative ranking                          | hybrid fuzzy AHP TOPSIS                          | Yes | interviews, questionnaires | No  |                              | No  |               |
| Su and Tung              | 2014 | Multi-criteria decision making under uncertainty for flood mitigation                                                                                  | Stochastic Environmental Research and Risk Assessment            | Greece      | alternative ranking                          | PROMETHEE II                                     | Yes | does not mention           | Yes | one-way sensitivity analysis | Yes | probabilistic |
| van Loon-Steensma et al. | 2014 | Green adaptation by innovative dike concepts along the Dutch Wadden Sea coast                                                                          | Environmental Science & Policy                                   | Netherlands | alternative ranking                          | WSM                                              | Yes | does not mention           | No  |                              | No  |               |
| Yeganeh and Sabri        | 2014 | Flood vulnerability assessment in Iskandar Malaysia using multi-criteria evaluation and fuzzy logic                                                    | Research Journal of Applied Sciences, Engineering and Technology | Malaysia    | susceptibility                               | WSM                                              | No  |                            | Yes | one-way sensitivity analysis | No  |               |

|                     |      |                                                                                                                                                                       |                                                        |             |                                             |                                                              |     |                                              |     |                                           |    |
|---------------------|------|-----------------------------------------------------------------------------------------------------------------------------------------------------------------------|--------------------------------------------------------|-------------|---------------------------------------------|--------------------------------------------------------------|-----|----------------------------------------------|-----|-------------------------------------------|----|
| Zhao et al.         | 2014 | Dynamic risk assessment model for flood disaster on a projection pursuit cluster and its application                                                                  | Stochastic Environmental Research and Risk Assessment  | China       | risk                                        | fuzzy AHP                                                    | Yes | does not mention                             | No  | No                                        |    |
| Zhou et al.         | 2014 | Study of the comprehensive risk analysis of dam-break flooding based on the numerical simulation of flood routing. Part II: model application and results             | Natural Hazards                                        | China       | risk                                        | AHP, TOPSIS                                                  | No  |                                              | Yes | one-way sensitivity analysis              | No |
| Ahmadisharaf et al. | 2015 | Evaluating the effects of inundation duration and velocity on selection of flood management alternatives using multi-criteria decision making                         | Water Resources Management                             | USA         | alternative ranking                         | SCP                                                          | No  |                                              | Yes | does not mention                          | No |
| Alipour             | 2015 | Risk-informed decision making framework for operating a multi-purpose hydropower reservoir during flooding and high inflow events, case study: Cheakamus River System | Water Resources Management                             | Canada      | reservoir flood control                     | AHP                                                          | No  |                                              | Yes | best and worst case scenarios             | No |
| Almoradie et al.    | 2015 | Web-based stakeholder collaboration in flood risk management                                                                                                          | Journal of Flood Risk Management                       | Germany, UK | alternative ranking                         | TOPSIS                                                       | Yes | web-based platform, workshops                | No  |                                           | No |
| Berry and BenDor    | 2015 | Integrating sea level rise into development suitability analysis                                                                                                      | Computers, Environments and Urban Systems              | USA         | susceptibility                              | AHP                                                          | No  |                                              | No  |                                           | No |
| Chen et al.         | 2015 | Flood hazard assessment in the Kujukuri Plain of Chiba Prefecture, Japan, based on GIS and multicriteria decision analysis                                            | Natural Hazards                                        | Japan       | hazard                                      | AHP                                                          | No  |                                              | Yes | global sensitivity analysis (FAST method) | No |
| Chitsaz et al.      | 2015 | Comparison of different multi criteria decision-making models in prioritizing flood management alternatives                                                           | Water Resources Management                             | Iran        | alternative ranking                         | WSM, CP, VIKOR, TOPSIS, M-TOPSIS, AHP ELECTRE I, ELECTRE III | Yes | does not mention                             | Yes | one-way sensitivity analysis              | No |
| Dassanayake et al.  | 2015 | Methods for the evaluation of intangible flood losses and their integration in flood risk analysis                                                                    | Coastal Engineering Journal                            | Germany     | risk                                        | MAUT, AHP                                                    | No  |                                              | No  |                                           | No |
| Gao et al.          | 2015 | Research on meteorological thresholds of drought and flood disaster: a case study in the Huai River Basin, China                                                      | Stochastic Environmental Research and Risk Assessment  | China       | hazard                                      | AHP                                                          | No  |                                              | No  |                                           | No |
| Godfrey et al.      | 2015 | Assessing vulnerability of buildings to hydro-meteorological hazards using an expert based approach – An application in Nehoiu Valley, Romania                        | International Journal of Disaster Risk Reduction       | Romania     | vulnerability                               | AHP                                                          | Yes | does not mention                             | No  |                                           | No |
| Lai et al.          | 2015 | A fuzzy comprehensive evaluation model for flood risk based on the combination weight of game theory                                                                  | Natural Hazards                                        | China       | susceptibility, hazard, vulnerability, risk | AHP                                                          | Yes | does not mention                             | No  |                                           | No |
| Lee et al.          | 2015 | Group decision-making approach for flood vulnerability identification with the fuzzy VIKOR method                                                                     | Natural Hazards and Earth System Sciences              | South Korea | risk                                        | group fuzzy VIKOR, fuzzy VIKOR, fuzzy TOPSIS                 | Yes | Delphi technique, questionnaires, interviews | No  |                                           | No |
| Mamun et al.        | 2015 | Application of a goal programming algorithm to incorporate environmental requirements in a multi-objective Columbia River Treaty Reservoir optimization model         | Canadian Water Resources Journal                       | Canada      | reservoir flood control                     | goal programming                                             | No  |                                              | No  |                                           | No |
| Nivolianitou et al. | 2015 | Flood disaster management with the use of AHP                                                                                                                         | International Journal of Multicriteria Decision Making | Greece      | emergency management                        | AHP                                                          | Yes | interviews                                   | No  |                                           | No |



|                    |      |                                                                                                                                                   |                                     |             |                                             |                                  |     |                  |     |                              |    |
|--------------------|------|---------------------------------------------------------------------------------------------------------------------------------------------------|-------------------------------------|-------------|---------------------------------------------|----------------------------------|-----|------------------|-----|------------------------------|----|
| Oumeraci et al.    | 2015 | XtremRisk — Integrated flood risk analysis for extreme storm surges at open coasts and in estuaries: methodology, key results and lessons learned | Coastal Engineering Journal         | Germany     | risk                                        | MAUT, AHP                        | No  |                  | No  |                              | No |
| Ou-Yang et al.     | 2015 | Highway flood disaster risk evaluation and management in China                                                                                    | Natural Hazards                     | China       | susceptibility, hazard, vulnerability, risk | AHP                              | Yes | does not mention | No  |                              | No |
| Papaioannou et al. | 2015 | Multi-criteria analysis framework for potential flood prone areas mapping                                                                         | Water Resources Management          | Greece      | susceptibility                              | fuzzy AHP, AHP                   | Yes | does not mention | No  |                              | No |
| Ronco et al.       | 2015 | KULTURisk regional risk assessment methodology for water-related natural hazards - Part 2: Application to the Zurich case study                   | Hydrology and Earth System Sciences | Switzerland | risk                                        | weighted average                 | Yes | group meetings   | No  |                              | No |
| Roy and Blaschke   | 2015 | Spatial vulnerability assessment of floods in the coastal regions of Bangladesh                                                                   | Geomatics, Natural Hazards and Risk | Bangladesh  | vulnerability, coping capacity              | AHP                              | Yes | does not mention | No  |                              | No |
| Seo et al.         | 2015 | Development of priority setting process for the small stream restoration projects using multi criteria decision analysis                          | Journal of Hydroinformatics         | South Korea | risk                                        | PROMETHEE, WSM                   | Yes | does not mention | No  |                              | No |
| Sowmya et al.      | 2015 | Urban flood vulnerability zoning of Cochin City, southwest coast of India, using remote sensing and GIS                                           | Natural Hazards                     | India       | vulnerability                               | WSM                              | No  |                  | No  |                              | No |
| Taib et al.        | 2015 | Conflicting bifuzzy multi-attribute group decision making model with application to flood control project                                         | Group Decision and Negotiation      | Malaysia    | alternative ranking                         | fuzzy TOPSIS, fuzzy AHP          | Yes | questionnaires   | Yes | one-way sensitivity analysis | No |
| Walczkiewicz       | 2015 | Multi-criteria analysis for selection of activity options limiting flood risk                                                                     | Water Resources                     | Poland      | alternative ranking                         | TOPSIS, sum of the weighted mean | Yes | does not mention | No  |                              | No |
| Wu et al.          | 2015 | Integrated flood risk assessment and zonation method: a case study in Huaihe River basin, China                                                   | Natural Hazards                     | China       | hazard, vulnerability, risk                 | AHP                              | Yes | does not mention | No  |                              | No |

\* "Does not mention" means that multiple stakeholders were considered in the analysis, but the authors did not specify the technique applied to capture the stakeholders' opinion. In the case where multiple stakeholders were not considered, this column was left empty
